# Supplementary material
Source: ML conference proceedings conference paper supplement (https://openaccess.thecvf.com/content/CVPR2025/html/Xie_EnvGS_Modeling_View-Dependent_CVPR_2025_paper.html)
Supplement: Supplementary file 1 [file Xie_EnvGS_Modeling_View-Dependent_CVPR_2025_supplemental.zip]

# EnvGS: Modeling View-Dependent Appearance with Environment Gaussian

## Supplementary Material

In the supplementary material, we provide more qualitative and quantitative results and per-scene breakdowns to demonstrate the effectiveness and robustness of our method (Sec. A). We also provide additional ablation studies to further analyze the key components of our method (Sec. B). Furthermore, we provide details on the gradient computation of our Gaussian tracer (Sec. D).

Accurate and smooth reflection reconstruction and rendering are key advantages of our method. We strongly encourage readers to view the rendered continuous videos in the supplementary material for a more comprehensive understanding of its performance.

### A. Additional Results

#### A.1. Comparison on Reflective Regions

To demonstrate the improvements in the reflective and near-field reflection regions using our environment Gaussian representation, we additionally annotate a reflection mask to compute metrics specifically for the reflective region and a near-field mask to evaluate near-field reflections on the Ref-Real [37] and NeRF-Casting [38] datasets. As shown in Tab. 2 and Fig. 6, our method achieves a significant improvement of over 1.0 PSNR  $\uparrow$  improvement on the reflective region and 2.0 PSNR  $\uparrow$  in the near-field regions compared to using an environment map. These results highlight the effectiveness of our approach in capturing and rendering complex reflective and near-field phenomena.

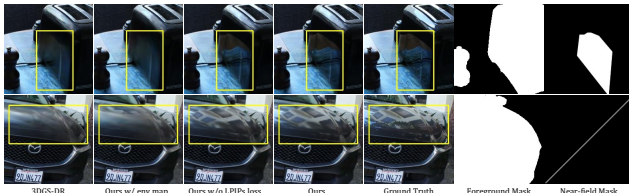

Figure 6. **Qualitative comparison on reflective foreground and near-field reflection regions.** We also provide visualizations of the foreground and near-field region mask we annotated.

The reflective masks mentioned above are obtained through the following steps. First, we train our EnvGS on each scene, then export the trained Gaussian and remove the Gaussian points in 3D space except for those in the foreground reflective region. We render the remaining Gaussian to generate an accumulated alpha map. Finally, we binarize this alpha map to obtain the foreground reflective masks. We manually annotate the near-field masks as they are difficult to define in 3D space.

The quantitative results in Tab. 2 are evaluated only in the masked regions, following NeRF-Casting [38], we compute these masked metrics by blending the masked regions onto a white background.

#### A.2. Comparison on Real-World Shiny Scenes

We present additional qualitative comparisons on the NeRF-Casting Shiny Scenes [38], including both indoor and outdoor real-world scenes featuring complex reflections. As shown in Fig. 9, our method significantly outperforms previous approaches in reflection fidelity and overall rendering quality, particularly excelling in near-field reflections and high-frequency reflection details.

We also provide per-scene breakdowns of Ref-Real [37] and NeRF-Casting Shiny Scenes [38] in Tab. 7. These results are consistent with the averaged results in the paper. All metrics are evaluated at the original resolution down-sampled by a factor of 4, following prior works [38]. Notably, our method is more general and does not rely on manually estimated bounding boxes for foreground objects, which are essential for 3DGS-DR [51] to prevent optimization failure.

#### A.3. Comparison on Shiny Blender [37]

In Tab. 8, Fig. 10 and Fig. 11, we present additional quantitative and qualitative comparisons on the Shiny Blender dataset [38], which is rendered with environment maps under distant lighting assumption. The results show that although being designed for robustness on real-world data, our method effectively reconstructs accurate distant specular reflections, performing on par with or surpassing prior methods GaussianShader [15] and 3DGS-DR [18] specifically designed for environment map lighting scenarios. EnvGS considerably outperforms these methods in capturing near-field reflections caused by self-occlusions, as illustrated in the zoomed-in regions of the “toaster” scene. Moreover, our method reconstructs more accurate geometry, as shown in Fig. 11.

#### A.4. Comparison on Mip-NeRF 360 [3]

We perform additional comparisons on the Mip-NeRF 360 dataset [3], which consists of large-scale real-world scenes with primarily diffuse appearance and complex geometry. As shown in Tab. 9, our method is not limited to reflective scenes and can achieve comparable or superior performance to both state-of-the-art implicit [4] and explicit [17] methods.

| Methods | Ref-Real [37] and NeRF-Casting [38] |                 |                    |                |
|---------|-------------------------------------|-----------------|--------------------|----------------|
|         | PSNR $\uparrow$                     | SSIM $\uparrow$ | LPIPS $\downarrow$ | FPS $\uparrow$ |
| ENVDR   | 15.890                              | 0.416           | 0.607              | 0.058          |
| NDE     | 19.399                              | 0.422           | 0.593              | 0.083          |
| Ours    | <b>27.947</b>                       | <b>0.794</b>    | <b>0.189</b>       | <b>26.221</b>  |

Table 5. Quantitative comparison with object-level methods.

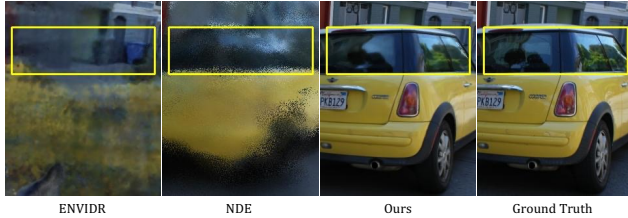

Figure 7. Qualitative comparison with object-level methods.

### A.5. Additional Baselines

We also compare our method with object-baselines including ENVDR [22] and NDE [45]. While object-level methods perform well on synthetic data, they often struggle with real-world scenes and cannot real-time rendering speed on scenes with background, as shown in Tab. 5 and Fig. 7.

## B. Additional Ablation Studies

### B.1. Environment Representation Comparison

As described in Sec. 5.4, the environment representation plays a crucial role in capturing complex reflections. In Fig. 8, we provide additional qualitative comparisons between our *environment Gaussian* representation and the environment map representation. The “w/ env. map 128” and “w/ env. map 256” variants replace our core *environment Gaussian* representation with environment maps using six cubemaps at resolutions of 128 and 256, respectively. The results demonstrate that both environment map variants fail to capture the near-field reflections and tend to blur high-frequency reflection details, whereas our *environment Gaussian* representation excels at capturing complex reflections with high fidelity.

### B.2. Speed Analysis

We conduct additional speed ablations on the “hatchback” from the NeRF-Casting Shiny Scenes [38] with resolution  $3504 \times 2336$  (which we downsample by a factor of 4, as done in all baselines and experiments). The results are listed in Tab. 6.

**Differentiable Gaussian tracing.** As discussed in Sec. 4.2, rendering the *environment Gaussian* primitives with rasterization is impractical due to the uniqueness of each reflected ray. To validate this, we compare two alternative rendering strategies: (1) manually computing the ray-primitive inter-

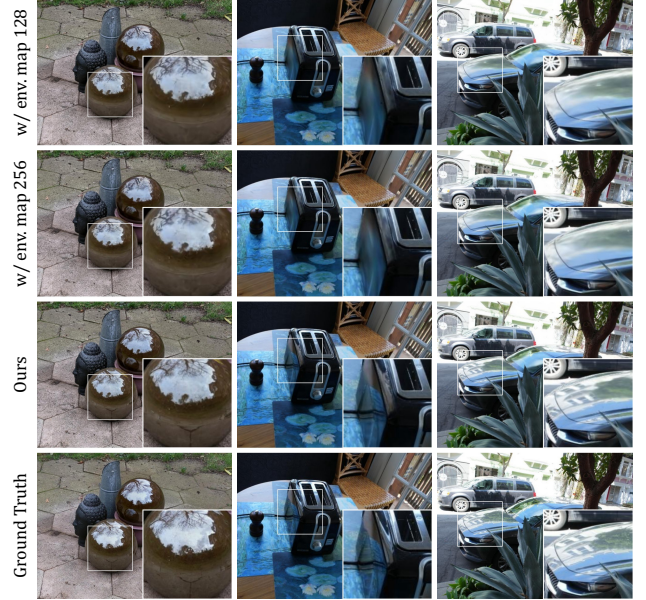

Figure 8. Qualitative comparison between the environment map representation and our environment Gaussian representation. Replacing the environment map with our environment Gaussian representation significantly improves the rendering quality, especially in capturing near-field reflections and high-frequency reflection details.

sections using PyTorch in a chunk-based manner (“w/ PyTorch”), and (2) rasterizing the *environment Gaussian* primitives with a modified 3DGS [17] rasterizer using  $1 \times 1$  tiles (“w/  $1 \times 1$ -tile rasterizer”). All three methods, including our Gaussian tracer, apply the same volume rendering equation as in Eq. 2. Quantitative results in Tab. 6 reveal that both alternative strategies take over an hour to render a single frame, whereas our Gaussian tracer achieves real-time rendering speeds, leveraging hardware-accelerated ray tracing.

|                                  | PSNR $\uparrow$ | SSIM $\uparrow$ | LPIPS $\downarrow$ | FPS $\uparrow$ |
|----------------------------------|-----------------|-----------------|--------------------|----------------|
| w/ PyTorch                       | -               | -               | -                  | 1/6157.613     |
| w/ $1 \times 1$ -tile rasterizer | -               | -               | -                  | 1/11902.431    |
| w/ 50% weight filtering          | 27.137          | 0.824           | 0.192              | 36.216         |
| w/ 75% weight filtering          | 27.104          | 0.823           | 0.192              | 41.824         |
| w/ 80% weight filtering          | 27.033          | 0.822           | 0.193              | 44.215         |
| w/ 90% weight filtering          | 26.695          | 0.816           | 0.197              | <b>47.149</b>  |
| Ours                             | <b>27.220</b>   | <b>0.838</b>    | <b>0.177</b>       | 32.259         |

Table 6. Runtime analysis of the proposed method on the hatchback of NeRF-Casting Shiny Scenes [38]. Rasterization or PyTorch-based ray tracing is impractical for rendering the *environment Gaussian* primitives. The acceleration techniques lead to minimal quality changes as shown by the cell.

**Rendering speed analysis.** As mentioned in Sec. 4.1, the rendering of our method consists of two main rounds: rasterization of the *base Gaussian* and ray tracing of the *en-*



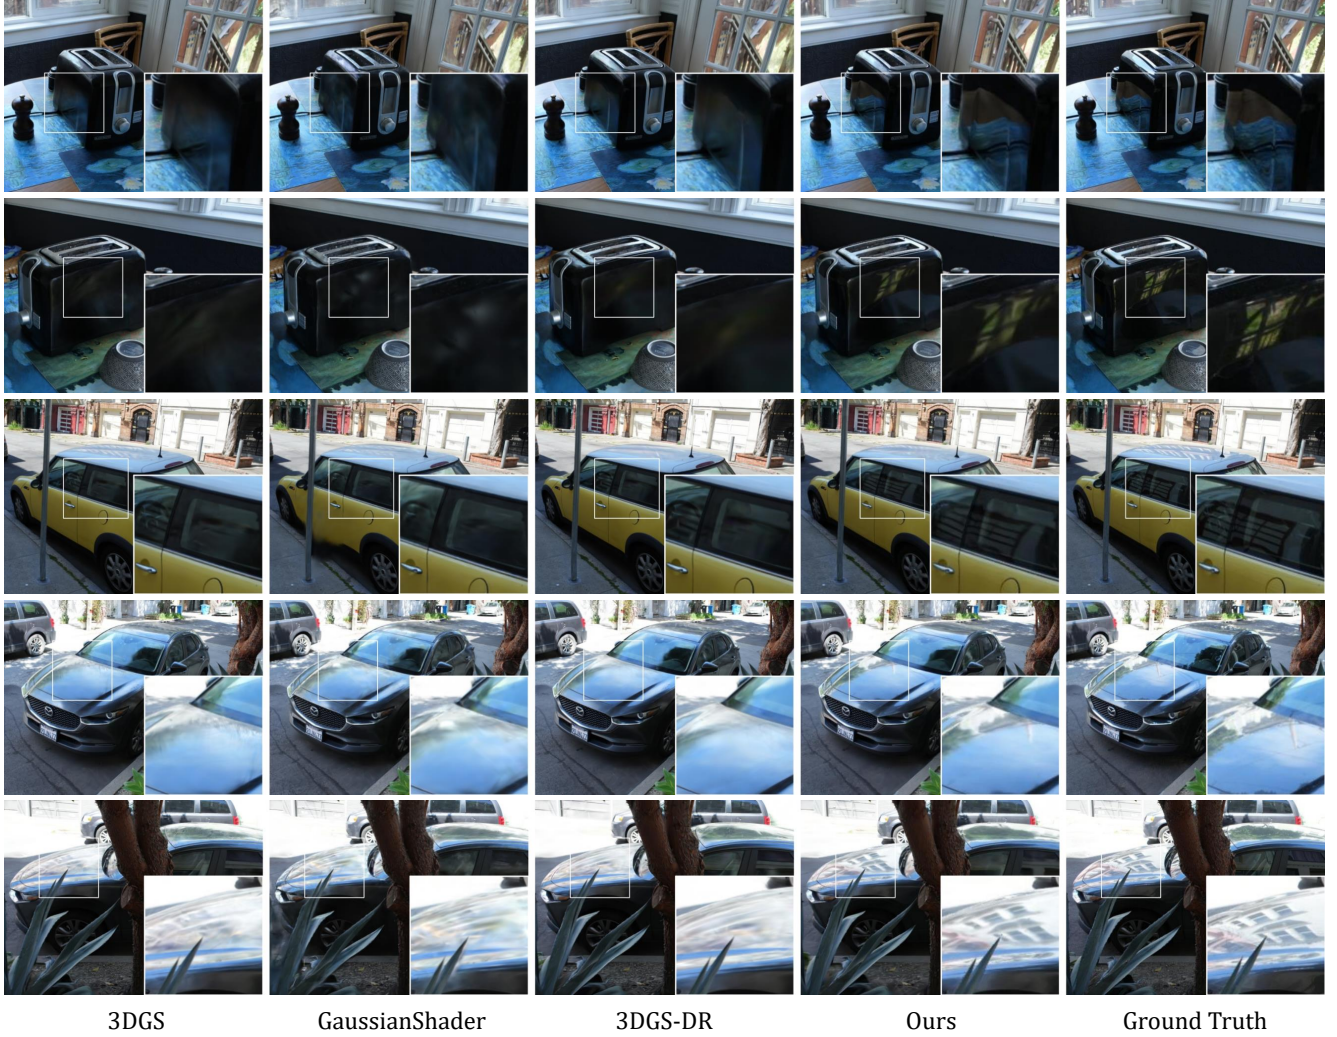

Figure 9. **Qualitative comparison on real scenes.** Our method significantly improves rendering quality over previous approaches, particularly in producing more detailed reflections. Zoom in for more details.

*environment Gaussian*, and the final color is the blending of the two. Based on the fact that only a small portion of the scene surface contains strong specular reflections, we can further accelerate the rendering process by only tracing rays with high blending weights, which are only made possible by our tracing-based renderer. We ablate the effectiveness and quality impact of this acceleration technique, results are shown in Tab. 6.

### B.3. Environment Gaussian Design

**The Necessity of using a separate environment Gaussian primitives.** To evaluate the decision to use separate Gaussian primitives for reflection modeling, we perform an experiment using a single set of Gaussian primitives for both reflection and base scene modeling. We first trace a camera ray to obtain the base color, normal and rendering weight,

then trace a secondary ray to render the reflection color, ultimately combining these results using Eq. (5) to get the final color. However, we found that the experiment consistently failed to converge due to unavoidable interference between suboptimal geometry during optimization and incorrectly hitting Gaussian primitives from erroneous reflection directions, leading to an unstable training process.

### C. Details of Environment Gaussian

We provide more details of our *base Gaussian* and *environment Gaussian*. The SH coefficients of both *base Gaussian* and *environment Gaussian* are set to two for the best results. The *environment Gaussian* is jointly optimized with the *base Gaussian*, and *environment Gaussian* constitutes around 15% of the *base Gaussian*, of average 300k Gaus-

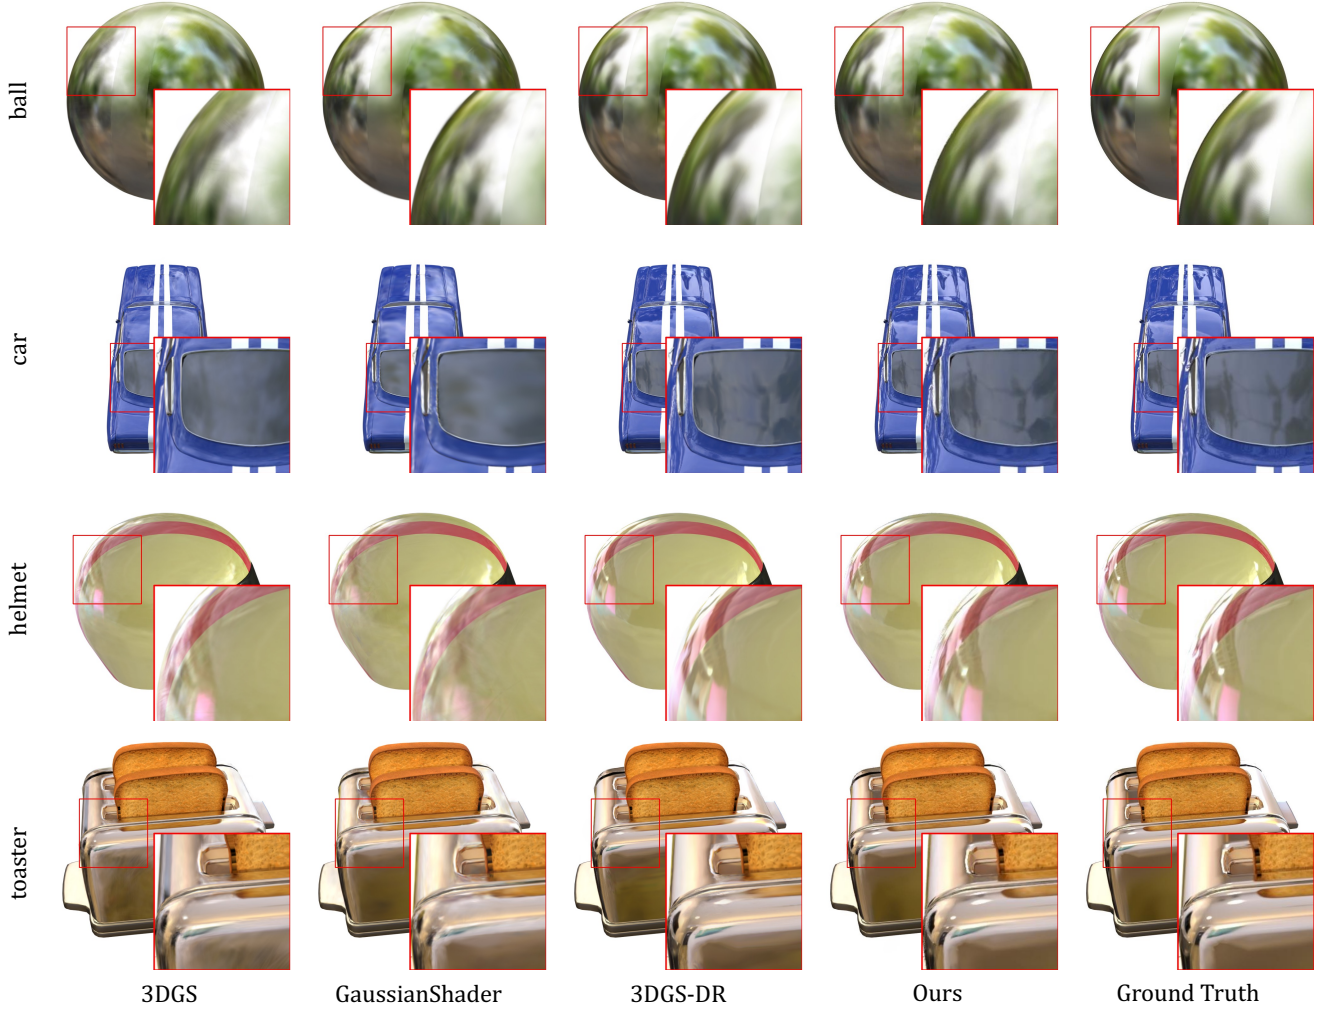

Figure 10. **Qualitative comparison on synthetic scenes.** Despite being designed for robustness on real-world data, our method effectively reconstructs accurate distant specular reflections and effectively captures near-field reflections caused by self-occlusions.

sian primitives using 70MB after training. For pruning, we follow the pruning method in the original 2DGS [13] and keep at most the top 630k *environment Gaussian* primitives based on rendering weights.

## D. Details of Gradient Computation

To enable the joint optimization of *base Gaussian* and *environment Gaussian* primitives, which is essential for accurate geometry recovery and reflection reconstruction (as demonstrated in Sec. 5.4), our Gaussian tracer must be fully differentiable. This requires computing gradients with respect to the input reflected ray origin,  $\frac{d\mathcal{L}}{d\mathbf{o}}$ , and direction,  $\frac{d\mathcal{L}}{d\mathbf{d}}$ . These gradients are backpropagated through the surface position  $\mathbf{x}$  and normal  $\mathbf{n}$ , obtained during the first rasterization stage, to the *base Gaussian* parameters for joint

optimization.

Consider an input ray with origin  $\mathbf{o}$  and direction  $\mathbf{d}$ , and a intersected triangle primitive  $i$  with vertices  $\mathbf{v}_1, \mathbf{v}_2, \mathbf{v}_3$ . During ray traversal, the OptiX kernel utilizes the GPU’s RT core to determine the intersection depth  $t_i$ , which is then used to compute the interaction position as  $\mathbf{x}_i = \mathbf{o} + t_i\mathbf{d}$ . This position is subsequently transformed into the local tangent plane of the corresponding 2D Gaussian, yielding  $\mathbf{u}_i$  via Eq. 6 for Gaussian value evaluation. Note that the ray-triangle intersection depth can be manually computed as:

$$t_i = \frac{\mathbf{n}_i^\top (\mathbf{v}_1 - \mathbf{o})}{\mathbf{n}_i^\top \mathbf{d}}, \quad (12)$$

where  $\mathbf{n}_i = (\mathbf{v}_2 - \mathbf{v}_1) \times (\mathbf{v}_3 - \mathbf{v}_1)$  is the normal direction of the triangle. Then, we can apply the chain rule to calculate



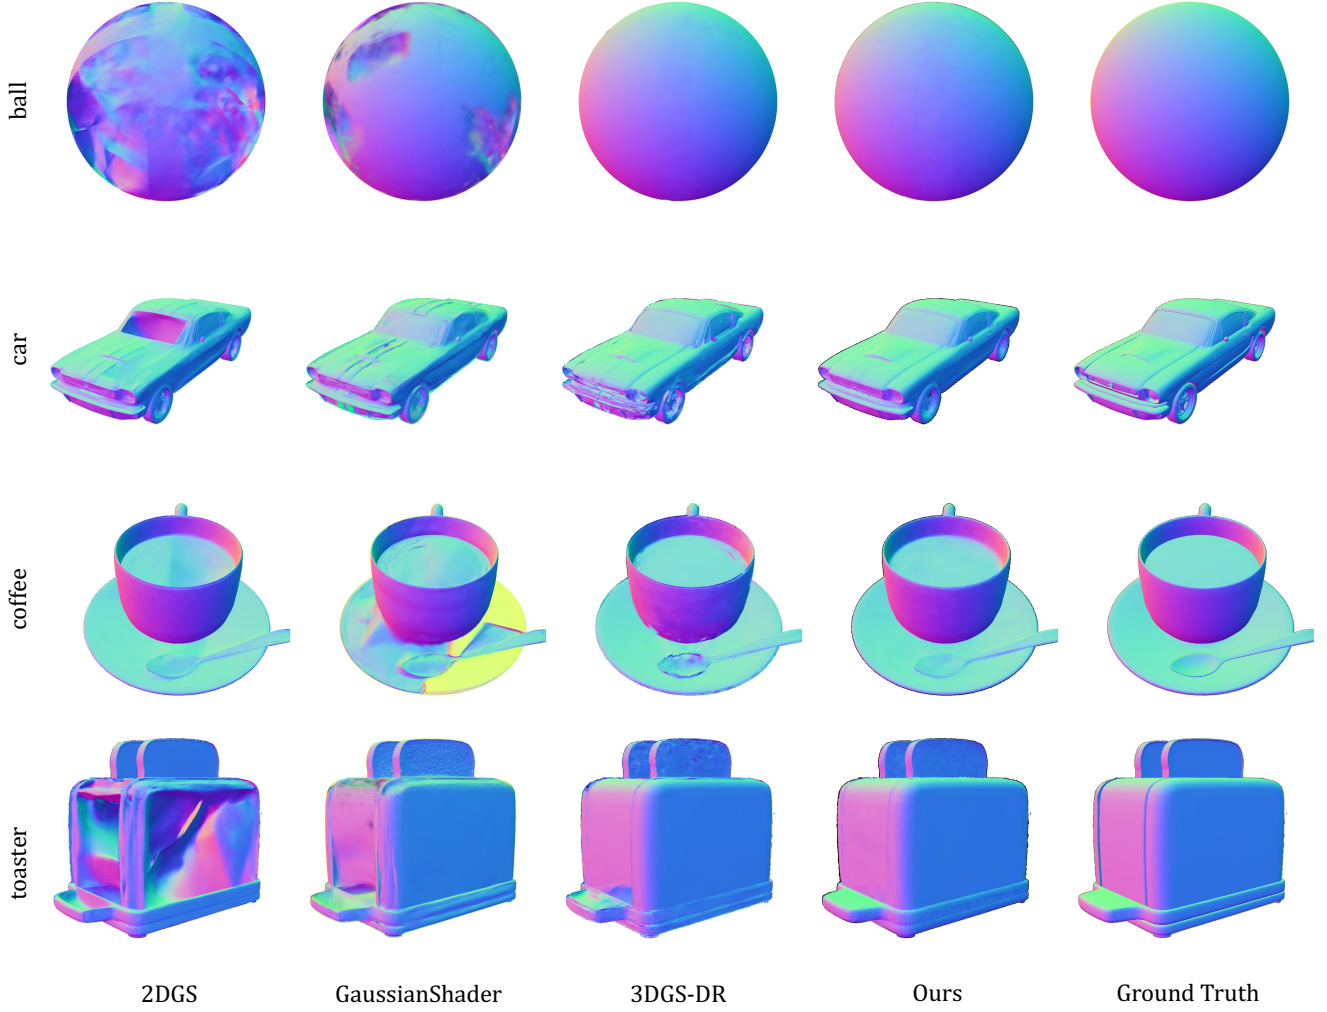

Figure 11. **Qualitative comparisons of normal produced by different methods.**

the derivatives w.r.t. the ray origin and direction:

$$\begin{aligned} \frac{d\mathcal{L}}{d\mathbf{o}} &= \frac{d\mathcal{L}}{d\mathbf{x}_i} \frac{d\mathbf{x}_i}{d\mathbf{o}} + \frac{d\mathcal{L}}{dt} \frac{dt}{d\mathbf{o}} \\ &= \frac{d\mathcal{L}}{d\mathbf{x}_i} + \frac{d\mathcal{L}}{dt} \cdot \frac{-\mathbf{n}_i}{\mathbf{n}_i^\top \mathbf{d}}, \end{aligned} \quad (13)$$

and

$$\begin{aligned} \frac{d\mathcal{L}}{d\mathbf{d}} &= \frac{d\mathcal{L}}{d\mathbf{x}_i} \frac{d\mathbf{x}_i}{d\mathbf{d}} + \frac{d\mathcal{L}}{dt} \frac{dt}{d\mathbf{d}} \\ &= \frac{d\mathcal{L}}{d\mathbf{x}_i} \cdot t_i + \frac{d\mathcal{L}}{dt} \cdot \frac{-\mathbf{n}_i^\top (\mathbf{v}_1 - \mathbf{o})}{\mathbf{n}_i \cdot (\mathbf{n}_i^\top \mathbf{d})^2}. \end{aligned} \quad (14)$$

This gradient flow enables the joint optimization of the reflection appearance of *environment Gaussian* alongside the geometry and base appearance of *base Gaussian*, enhancing both geometry accuracy and reflection fidelity.

| PSNR $\uparrow$      | Methods             | Ref-Real [37] |               |                | NeRF-Casting Shiny Scenes [38] |                |                  |                |
|----------------------|---------------------|---------------|---------------|----------------|--------------------------------|----------------|------------------|----------------|
|                      |                     | <i>sedan</i>  | <i>toycar</i> | <i>spheres</i> | <i>compact</i>                 | <i>grinder</i> | <i>hatchback</i> | <i>toaster</i> |
| <i>Non real-time</i> | Ref-NeRF* [37]      | 25.390        | 22.750        | 21.120         | 30.550                         | 33.910         | 25.210           | 32.660         |
|                      | UniSDF [39]         | 24.680        | 24.150        | 22.270         | 29.720                         | 33.720         | 27.010           | 32.900         |
|                      | ZipNeRF [4]         | 25.850        | 23.410        | 21.770         | 31.100                         | 34.670         | 27.780           | 33.410         |
|                      | NeRF-Casting [38]   | 26.770        | 24.200        | 23.040         | 29.730                         | 34.000         | 27.490           | 32.870         |
| <i>Real-time</i>     | 3DGS [17]           | 25.240        | 23.910        | 21.950         | 28.945                         | 30.885         | 26.201           | 29.410         |
|                      | 2DGS [13]           | 25.065        | 24.282        | 22.064         | 28.415                         | 30.164         | 25.893           | 28.630         |
|                      | GaussianShader [14] | 24.081        | 23.137        | 21.408         | 27.474                         | 26.572         | 24.959           | 26.641         |
|                      | 3DGS-DR [51]        | 25.445        | 23.582        | 21.539         | 28.692                         | 30.129         | 25.985           | 29.141         |
|                      | Ours                | 26.156        | 24.746        | 22.949         | 29.608                         | 33.331         | 27.220           | 31.618         |

  

| SSIM $\uparrow$      | Methods             | Ref-Real [37] |               |                | NeRF-Casting Shiny Scenes [38] |                |                  |                |
|----------------------|---------------------|---------------|---------------|----------------|--------------------------------|----------------|------------------|----------------|
|                      |                     | <i>sedan</i>  | <i>toycar</i> | <i>spheres</i> | <i>compact</i>                 | <i>grinder</i> | <i>hatchback</i> | <i>toaster</i> |
| <i>Non real-time</i> | Ref-NeRF* [37]      | 0.721         | 0.612         | 0.542          | 0.907                          | 0.880          | 0.842            | 0.932          |
|                      | UniSDF [39]         | 0.700         | 0.639         | 0.567          | 0.895                          | 0.879          | 0.845            | 0.937          |
|                      | ZipNeRF [4]         | 0.733         | 0.626         | 0.545          | 0.913                          | 0.887          | 0.870            | 0.944          |
|                      | NeRF-Casting [38]   | 0.739         | 0.641         | 0.597          | 0.884                          | 0.882          | 0.853            | 0.938          |
| <i>Real-time</i>     | 3DGS [17]           | 0.713         | 0.636         | 0.573          | 0.877                          | 0.864          | 0.838            | 0.928          |
|                      | 2DGS [13]           | 0.704         | 0.662         | 0.595          | 0.857                          | 0.854          | 0.819            | 0.917          |
|                      | GaussianShader [14] | 0.668         | 0.625         | 0.573          | 0.851                          | 0.799          | 0.805            | 0.884          |
|                      | 3DGS-DR [51]        | 0.714         | 0.635         | 0.571          | 0.857                          | 0.849          | 0.813            | 0.914          |
|                      | Ours                | 0.727         | 0.667         | 0.619          | 0.871                          | 0.895          | 0.838            | 0.938          |

  

| LPIPS $\downarrow$   | Methods             | Ref-Real [37] |               |                | NeRF-Casting Shiny Scenes [38] |                |                  |                |
|----------------------|---------------------|---------------|---------------|----------------|--------------------------------|----------------|------------------|----------------|
|                      |                     | <i>sedan</i>  | <i>toycar</i> | <i>spheres</i> | <i>compact</i>                 | <i>grinder</i> | <i>hatchback</i> | <i>toaster</i> |
| <i>Non real-time</i> | Ref-NeRF* [37]      | 0.270         | 0.257         | 0.257          | 0.105                          | 0.123          | 0.156            | 0.111          |
|                      | UniSDF [39]         | 0.309         | 0.245         | 0.243          | 0.122                          | 0.132          | 0.160            | 0.107          |
|                      | ZipNeRF [4]         | 0.260         | 0.243         | 0.238          | 0.096                          | 0.111          | 0.130            | 0.082          |
|                      | NeRF-Casting [38]   | 0.254         | 0.246         | 0.238          | 0.148                          | 0.114          | 0.155            | 0.096          |
| <i>Real-time</i>     | 3DGS [17]           | 0.301         | 0.237         | 0.248          | 0.154                          | 0.181          | 0.179            | 0.123          |
|                      | 2DGS [13]           | 0.344         | 0.246         | 0.254          | 0.193                          | 0.217          | 0.215            | 0.147          |
|                      | GaussianShader [14] | 0.371         | 0.293         | 0.278          | 0.189                          | 0.289          | 0.217            | 0.169          |
|                      | 3DGS-DR [51]        | 0.322         | 0.249         | 0.251          | 0.196                          | 0.219          | 0.228            | 0.146          |
|                      | Ours                | 0.287         | 0.208         | 0.229          | 0.159                          | 0.151          | 0.177            | 0.110          |

Table 7. **Ref-Real [37] and NeRF-Casting [38] per-scene breakdowns.** All metrics are evaluated at the original resolution downsample by a factor of 4 as prior works [38].

| PSNR $\uparrow$      | Methods             | Shiny Blender Scenes [37] |            |               |               |               |                |
|----------------------|---------------------|---------------------------|------------|---------------|---------------|---------------|----------------|
|                      |                     | <i>ball</i>               | <i>car</i> | <i>coffee</i> | <i>helmet</i> | <i>teapot</i> | <i>toaster</i> |
| <i>Non real-time</i> | Ref-NeRF [37]       | 47.460                    | 30.820     | 34.210        | 29.680        | 47.900        | 25.700         |
|                      | UniSDF [39]         | 44.100                    | 29.860     | 33.170        | 38.840        | 48.760        | 26.180         |
|                      | NeRF-Casting [38]   | 45.460                    | 30.450     | 33.180        | 39.100        | 49.980        | 26.190         |
| <i>Real-time</i>     | 3DGS [17]           | 27.650                    | 27.260     | 32.300        | 28.220        | 45.710        | 20.990         |
|                      | 2DGS [13]           | 25.990                    | 26.730     | 32.360        | 27.300        | 44.940        | 20.272         |
|                      | GaussianShader [14] | 29.081                    | 26.940     | 31.147        | 28.883        | 43.379        | 23.584         |
|                      | 3DGS-DR [51]        | 33.533                    | 30.236     | 34.580        | 31.518        | 47.038        | 26.823         |
|                      | 3iGS [36]           | 27.640                    | 27.510     | 32.580        | 28.210        | 46.040        | 22.690         |
|                      | Ours                | 32.567                    | 30.598     | 34.312        | 31.470        | 46.582        | 27.427         |

  

| SSIM $\uparrow$      | Methods             | Shiny Blender Scenes [37] |            |               |               |               |                |
|----------------------|---------------------|---------------------------|------------|---------------|---------------|---------------|----------------|
|                      |                     | <i>ball</i>               | <i>car</i> | <i>coffee</i> | <i>helmet</i> | <i>teapot</i> | <i>toaster</i> |
| <i>Non real-time</i> | Ref-NeRF [37]       | 0.995                     | 0.955      | 0.974         | 0.958         | 0.998         | 0.922          |
|                      | UniSDF [39]         | 0.993                     | 0.954      | 0.973         | 0.990         | 0.998         | 0.945          |
|                      | NeRF-Casting [38]   | 0.994                     | 0.964      | 0.973         | 0.988         | 0.999         | 0.950          |
| <i>Real-time</i>     | 3DGS [17]           | 0.937                     | 0.931      | 0.972         | 0.951         | 0.996         | 0.894          |
|                      | 2DGS [13]           | 0.935                     | 0.932      | 0.973         | 0.952         | 0.997         | 0.892          |
|                      | GaussianShader [14] | 0.955                     | 0.930      | 0.969         | 0.955         | 0.996         | 0.907          |
|                      | 3DGS-DR [51]        | 0.979                     | 0.957      | 0.976         | 0.971         | 0.997         | 0.943          |
|                      | 3iGS [36]           | 0.938                     | 0.930      | 0.973         | 0.951         | 0.997         | 0.908          |
|                      | Ours                | 0.971                     | 0.958      | 0.974         | 0.968         | 0.997         | 0.945          |

  

| LPIPS $\downarrow$   | Methods             | Shiny Blender Scenes [37] |            |               |               |               |                |
|----------------------|---------------------|---------------------------|------------|---------------|---------------|---------------|----------------|
|                      |                     | <i>ball</i>               | <i>car</i> | <i>coffee</i> | <i>helmet</i> | <i>teapot</i> | <i>toaster</i> |
| <i>Non real-time</i> | Ref-NeRF [37]       | 0.059                     | 0.041      | 0.078         | 0.075         | 0.004         | 0.095          |
|                      | UniSDF [39]         | 0.039                     | 0.047      | 0.078         | 0.021         | 0.004         | 0.072          |
|                      | NeRF-Casting [38]   | 0.044                     | 0.033      | 0.074         | 0.018         | 0.002         | 0.073          |
| <i>Real-time</i>     | 3DGS [17]           | 0.162                     | 0.047      | 0.079         | 0.081         | 0.008         | 0.125          |
|                      | 2DGS [13]           | 0.155                     | 0.051      | 0.080         | 0.080         | 0.008         | 0.126          |
|                      | GaussianShader [14] | 0.145                     | 0.066      | 0.085         | 0.086         | 0.011         | 0.105          |
|                      | 3DGS-DR [51]        | 0.104                     | 0.038      | 0.076         | 0.050         | 0.006         | 0.082          |
|                      | 3iGS [36]           | 0.156                     | 0.045      | 0.076         | 0.073         | 0.006         | 0.099          |
|                      | Ours                | 0.138                     | 0.037      | 0.085         | 0.052         | 0.006         | 0.077          |

Table 8. Quantitative results on Shiny Blender Scenes [37].

| PSNR $\uparrow$      | Methods             | Mip-NeRF 360 [3] |               |                |                |               |                |             |              |                 |
|----------------------|---------------------|------------------|---------------|----------------|----------------|---------------|----------------|-------------|--------------|-----------------|
|                      |                     | <i>bicycle</i>   | <i>bonsai</i> | <i>counter</i> | <i>flowers</i> | <i>garden</i> | <i>kitchen</i> | <i>room</i> | <i>stump</i> | <i>treehill</i> |
| <i>Non real-time</i> | Ref-NeRF* [37]      | 24.910           | 32.290        | 26.020         | 21.630         | 27.450        | 31.610         | 31.680      | 25.910       | 21.790          |
|                      | UniSDF [39]         | 24.670           | 32.860        | 29.260         | 21.830         | 27.460        | 31.730         | 31.250      | 26.390       | 23.510          |
|                      | ZipNeRF [4]         | 25.800           | 34.460        | 29.380         | 22.400         | 28.200        | 32.500         | 32.650      | 27.550       | 23.890          |
|                      | NeRF-Casting [38]   | 24.920           | 33.810        | 28.840         | 21.750         | 27.310        | 32.260         | 31.660      | 25.640       | 23.220          |
| <i>Real-time</i>     | 3DGS [17]           | 25.250           | 31.980        | 28.700         | 21.520         | 27.410        | 30.320         | 30.630      | 26.550       | 22.490          |
|                      | 2DGS [13]           | 24.741           | 31.246        | 28.107         | 21.131         | 26.723        | 30.372         | 30.679      | 26.123       | 22.427          |
|                      | GaussianShader [14] | 23.103           | 29.278        | 26.639         | 20.267         | 26.290        | 27.125         | 24.098      | 24.668       | 20.552          |
|                      | 3DGS-DR [51]        | 24.869           | 31.232        | 27.730         | 21.116         | 27.142        | 28.999         | 30.068      | 25.473       | 21.344          |
|                      | Ours                | 25.209           | 31.946        | 29.017         | 21.551         | 27.709        | 31.660         | 31.020      | 25.423       | 22.686          |

  

| SSIM $\uparrow$      | Methods             | Mip-NeRF 360 [3] |               |                |                |               |                |             |              |                 |
|----------------------|---------------------|------------------|---------------|----------------|----------------|---------------|----------------|-------------|--------------|-----------------|
|                      |                     | <i>bicycle</i>   | <i>bonsai</i> | <i>counter</i> | <i>flowers</i> | <i>garden</i> | <i>kitchen</i> | <i>room</i> | <i>stump</i> | <i>treehill</i> |
| <i>Non real-time</i> | Ref-NeRF* [37]      | 0.723            | 0.935         | 0.875          | 0.592          | 0.845         | 0.922          | 0.914       | 0.731        | 0.634           |
|                      | UniSDF [39]         | 0.737            | 0.939         | 0.888          | 0.606          | 0.844         | 0.919          | 0.914       | 0.759        | 0.670           |
|                      | ZipNeRF [4]         | 0.769            | 0.949         | 0.902          | 0.642          | 0.860         | 0.928          | 0.925       | 0.800        | 0.681           |
|                      | NeRF-Casting [38]   | 0.747            | 0.945         | 0.887          | 0.605          | 0.836         | 0.924          | 0.911       | 0.749        | 0.653           |
| <i>Real-time</i>     | 3DGS [17]           | 0.771            | 0.938         | 0.905          | 0.605          | 0.868         | 0.922          | 0.914       | 0.775        | 0.638           |
|                      | 2DGS [13]           | 0.734            | 0.931         | 0.893          | 0.575          | 0.844         | 0.917          | 0.907       | 0.756        | 0.618           |
|                      | GaussianShader [14] | 0.700            | 0.917         | 0.875          | 0.541          | 0.842         | 0.888          | 0.839       | 0.701        | 0.579           |
|                      | 3DGS-DR [51]        | 0.740            | 0.933         | 0.889          | 0.578          | 0.852         | 0.908          | 0.904       | 0.750        | 0.607           |
|                      | Ours                | 0.734            | 0.933         | 0.899          | 0.589          | 0.854         | 0.923          | 0.910       | 0.726        | 0.621           |

  

| LPIPS $\downarrow$   | Methods             | Mip-NeRF 360 [3] |               |                |                |               |                |             |              |                 |
|----------------------|---------------------|------------------|---------------|----------------|----------------|---------------|----------------|-------------|--------------|-----------------|
|                      |                     | <i>bicycle</i>   | <i>bonsai</i> | <i>counter</i> | <i>flowers</i> | <i>garden</i> | <i>kitchen</i> | <i>room</i> | <i>stump</i> | <i>treehill</i> |
| <i>Non real-time</i> | Ref-NeRF* [37]      | 0.256            | 0.182         | 0.213          | 0.317          | 0.132         | 0.121          | 0.206       | 0.261        | 0.294           |
|                      | UniSDF [39]         | 0.243            | 0.184         | 0.206          | 0.320          | 0.136         | 0.124          | 0.206       | 0.242        | 0.265           |
|                      | ZipNeRF [4]         | 0.208            | 0.173         | 0.185          | 0.273          | 0.118         | 0.116          | 0.196       | 0.193        | 0.242           |
|                      | NeRF-Casting [38]   | 0.231            | 0.176         | 0.203          | 0.312          | 0.142         | 0.118          | 0.216       | 0.244        | 0.273           |
| <i>Real-time</i>     | 3DGS [17]           | 0.205            | 0.205         | 0.204          | 0.336          | 0.103         | 0.129          | 0.220       | 0.210        | 0.317           |
|                      | 2DGS [13]           | 0.267            | 0.227         | 0.229          | 0.374          | 0.145         | 0.146          | 0.243       | 0.258        | 0.374           |
|                      | GaussianShader [14] | 0.275            | 0.242         | 0.243          | 0.380          | 0.131         | 0.170          | 0.307       | 0.277        | 0.394           |
|                      | 3DGS-DR [51]        | 0.254            | 0.230         | 0.231          | 0.368          | 0.135         | 0.151          | 0.247       | 0.248        | 0.375           |
|                      | Ours                | 0.233            | 0.180         | 0.194          | 0.339          | 0.112         | 0.120          | 0.207       | 0.262        | 0.347           |

Table 9. **Quantitative results on Mip-NeRF 360 [3].** The results in “Non Real-time” are borrowed from NeRF-Casting [38], and Ref-NeRF\* is an improved version of Ref-NeRF [37] that uses ZipNeRF’s [4] geometry model.
